# Supplementary material for: Embryonic hematopoiesis modulates the inflammatory response and larval hematopoiesis in Drosophila
Source: eLife. 2018 Jul 11;7:e34890. doi: 10.7554/eLife.34890 (PMC6040882; doi:10.7554/eLife.34890)
Supplement: Figure 1—source data 1. [file elife-34890-fig1-data1.xlsx]

## Sheet: Sheet1
Figure		Statisitcal test		p-values
Fig. 1	b	Chi-squared	n>50	Col1 vs Col4=2.38E-21 ; Col1 vs Col5=2.54E-09 ; Col4 vs Col6=4.09E-16
Fig. 1	c	Chi-squared	n>40	Col1 vs Col2=1.94E-05
Fig. 1	d	student test	n=3	Col1 vs Col2=0.100 ; Col1 vs Col3=2.61E-07 ; Col3 vs Col4=0.016
Fig. 1	e	student test	n=3	Control vs HopTum/+=2.61E-07 ; HopTum/+ vs HopTum/gcmKD=0.016 ; HopTum/+ (% Lamellocytes) vs HopTum/gcmKD (% Lamellocytes)=0.045
Fig. 1	f	student test	n=4	crq=0.1055 ; eater=0.0245 ; NimC1=0.4954 ; He=0.2626 ; Hml=0.2929 ; lectin24-A=0.0729 ; a-PS5=0.4173 ; B-int-v=0.0296 ; PPO3=0.0056 ; Flamin-240=0.1573 ; mys=0.28 ; Tep1=0.1198 ; Tep4=0.3373
Fig. 2	e	student test	n=3	Ptp61F=0.00275 ; Socs36E=0.00236 ; Socs44A=0.00980
Fig. 2	f	student test	n=6	Ptp61F=0,00967 ; Socs36E=0.00044 ; Socs44A=1,47E-6
Fig. 2	g	Chi-squared	n>50	Col1 vs Col2=1.65E-12 ; Col1 vs Col3=1.08E-13 ; Col1 vs Col4=6.28E-14 ; Col5 vs Col6=2.88E-33 ; Col5 vs Col7=2.85E-38
Fig. 2	h	student test	n=6	apt=0,0272; CG1572=0,0383; CG13559=0,0969; Galphaf=0,0333; slbo=0,0413; gcm=1,1E-6
Fig. 4	d	Chi-squared	n>50	Col1 vs Col2=0.082 ; Col1 vs Col3=0.010
Fig. 4	e-e'	student test	n=3	Col1 vs Col2=0.00035 ; Col1 vs Col3=3,44E-6
Fig. 4	f	student test	n=3	Col1 vs Col2=1.71E-05 ; Col1 vs Col3=0,02254
Fig. 4	g	student test	n>5	Col1 = 0,00992; Col2 = 0,00026; Col3 = 0,00251 ; Col4 = 9,31E-5
Fig. 4	h	Chi-squared	n>50	Col1 vs Col2=5.32E-11 ; Col1 vs Col3=4.11E-09 ; Col1 vs Col4=0.082 ; Col4 vs Col5=9.35E-14 ; Col4 vs Col6=3.06E-14
Fig. 5	a	Chi-squared	n>50	Systemic HopTum vs Conditional HopTum=0.247 ; Conditional HopTum vs Conditional HopTum/gcmKD=4.97E-05
Fig. 5	a	Chi-squared	n>40	Systemic HopTum vs Conditional HopTum=1.27E-05 ; Conditional HopTum vs Conditional HopTum/gcmKD=0.159
Fig. 5	c	student test	n>3	Total hemocyte - gcm> vs Conditional HopTum/gcmKD=0.03443 ; gcm> vs Conditional HopTum= 0,0183443; Systemic HopTum vs Conditional HopTum= 0,00021; Conditional HopTum vs Conditional HopTum/gcmKD= 0,34531 ; Circulating hemocytes - gcm> vs Conditional HopTum=0.00030 ; gcm> vs Conditional HopTum/gcmKD=0.00032 ; Systemic HopTum vs Conditional HopTum=3.74E-06 ; Conditional HopTum vs Conditional HopTum/…
Fig. 6	d	student test	n>20	Box1 vs Box2=0.00875 ; Box1 vs Box3=2,34E-8 ; Box2 vs Box3= 0,000241
Fig. 6	e	student test	n>30	Box1 vs Box2=0,15309 ; Box1 vs Box3=3,5E-6 ; Box2 vs Box3= 1,67E-7
Fig. 7	a	Chi-squared	n>30	Col1 vs Col3 = 6,24E-8 ; Col2 vs Col3 = 2,20E-7
Fig. 7	b	student test	n=4	p = 0,03516
Fig. 8		student test	n=3	Hemocytes from embryo stage 16 - eater=0,2074 ; PPO3=0,2736 ; B-int-v=0,1470 ; Ptp61F=0,0110 ; Upd2= 0,02058; Upd3= 0,01087; Hemocytes from 3rd instar larvae - eater=0.0245 ; PPO3=0.0056 ; B-int-v=0.0296 ; Ptp61F=0.338 ; Upd2=0,00036 ; Upd3=1,72E-5
Fig. 9	d	student test	n>11	Control vs after wasp infestation=2,87736E-16
Fig. 1 – Fig. Supp. 2	e	student test	n=6	p = 0,00184
Fig. 1 – Fig. Supp. 3	a	student test	n=9	Col1 vs Col2 = 8,51E-7; Col2 vs Col3 = 0,00000696
Fig. 1 – Fig. Supp. 3	b	student test	n=5	p = 0,00012
Fig. 1 – Fig. Supp. 3	c	student test	n=4	lz=0.099 ; hnt=0.171 ; PPO1=0.255
Fig. 1 – Fig. Supp. 3	g	student test	n=6	Col1 vs Col2=0.445 ; Col2 vs Col3=0.123
Fig. 1 – Fig. Supp. 4	e	Chi-squared	n>50	Col1 vs Col2=0.042 ; Col3 vs Col4=6.86E-11 ; Col5 vs Col6=8.80E-17 ; Col6 vs Col7=0.00037 ; Col9 vs Col10=0.0016
Fig. 1 – Fig. Supp. 4	f	student test	n=3 (at least 30 cells per replicate)	Col1 vs Col2 p = 0,00074; Col2 vs Col3 p = 0,0007401
Fig. 4 – Fig. Supp. 1	a	Chi-squared	n>50	Col1 vs Col2=0.0066 ; Col1 vs Col3=0.0092
Fig. 4 – Fig. Supp. 1	b-b'	student test	n=3	Upd2= 0,02058; Upd3= 0,01087
Fig. 4 – Fig. Supp. 1	e	student test	n=3	Col1 vs Col2=0.0021 ; Col1 vs Col3=0.0003 ; Col2 vs Col5=0.1121 ; Col3 vs Col7=0.103 ; Col4 vs Col5=0.0146 ; Col4 vs Col6=0.0097
Fig. 5 – Fig. Supp. 1	a	Chi-squared	n>50	Col1 vs Col2=0.503 ; Col1 vs Col3=0.069 ; Col1 vs Col4=0.247 ; Col1 vs Col5=0.084
Fig. 5 – Fig. Supp. 1	b	Chi-squared	n=40	Col1 vs Col2=0.1188 ; Col2 vs Col5=0,001211
Fig. 5 – Fig. Supp. 1	c	student test	n=3	Col1 vs Col2=0.178 ; Col1 vs Col3=0.047 ; Col2 vs Col3=0.120 ; Col2 vs Col5=0.083
Fig. 5 – Fig. Supp. 1	d	student test	n=3	Col1 vs Col2=0.165 ; Col2 vs Col5=0.396
Fig. 5 – Fig. Supp. 1	e	student test	n=3	Col1 vs Col2=0.140 ; Col2 vs Col5=0.448
Fig. 5 – Fig. Supp. 1	f	student test	n=3	Col1 vs Col2=0.0016 ; Col2 vs Col5=0.132
Fig. 5 – Fig. Supp. 1	j	student test	n=3	Col1 vs Col2=0.00123
Fig. 5 – Fig. Supp. 1	k	student test	n=3	Col1 vs Col2=0.00857
